# Supplementary material for: Resampling-based methods for biologists
Source: PeerJ journal article supplement (doi:10.7717/peerj.9089), 2020-05-07
Supplement: Supplementary_Appendix_A.pdf [file Supplementary_Appendix_A.pdf]

# Supplementary Appendix A: Linear Regression Example

*jfieberg*

*2020-01-09*

## Objective

This simulation example demonstrates how to conduct a permutation-based test for a partial regression coefficient in a multiple linear regression model.

## Document Preamble

```
# Load Libraries
library(knitr)
library(mosaic)
library(ggplot2)
library(MASS)

# Set knitr options
opts_chunk$set(fig.width = 6, fig.height=5)

# Clear Environment (optional)
remove(list=ls())

# Set seed
set.seed(314159)
```

## Simulation Example

Here we will consider a simple simulation where a response variable,  $y$ , is related to two predictor variables,  $x_1$  and  $x_2$ . The predictors are themselves correlated. We will illustrate a simple permutation-based test for the effect of  $x_1$ , adjusted for  $x_2$ .

Steps:

1. Fit a linear regression model relating  $x_1$  to  $x_2$ .
2. Add the residuals from this model to the original data set.
3. Create the permutation distribution by shuffling these residuals.
4. Determine the p-value by comparing the t-statistic from the fit to the original data set to the permutation-based distribution of this same statistic.

Simulation parameters

- Sigma (variance/covariance matrix of  $x_1$  and  $x_2$ ).
- We will assume mean of  $x_1$  and  $x_2 = 0$
- Beta = vector of regression parameters (with intercept=0)

```
Sigma <- matrix(c(10,3,3,2),2,2)
Beta <- c(0.2, -0.5)
```

Create correlated predictors

```
X<- mvrnorm(n = 100, rep(0, 2), Sigma)
cor(X)
```

```
##           [,1]      [,2]
## [1,] 1.0000000 0.6054432
## [2,] 0.6054432 1.0000000
```

Form response variables

```
y<-X%%Beta+rnorm(100,0,2)
Mydata<-data.frame(y=y, x1=X[,1], x2=X[,2])
```

Fit regression model to the data

```
lmsim<-lm(y~x1+x2, data=Mydata)
summary(lmsim)
```

```
##
## Call:
## lm(formula = y ~ x1 + x2, data = Mydata)
##
## Residuals:
##      Min       1Q   Median       3Q      Max
## -4.9605 -1.3618 -0.1088  1.2206  5.3751
##
## Coefficients:
##              Estimate Std. Error t value Pr(>|t|)
## (Intercept) -0.05740    0.21377  -0.269  0.78888
## x1           0.18488    0.08781   2.105  0.03783 *
## x2          -0.66629    0.20420  -3.263  0.00152 **
## ---
## Signif. codes:  0 '***' 0.001 '**' 0.01 '*' 0.05 '.' 0.1 ' ' 1
##
## Residual standard error: 2.134 on 97 degrees of freedom
## Multiple R-squared:  0.09913,    Adjusted R-squared:  0.08056
## F-statistic: 5.337 on 2 and 97 DF,  p-value: 0.006326
```

Step 1: capture the part of x1 that is not related to x2

```
lm1<-lm(x1~x2, data=Mydata)
Mydata<-Mydata %>% mutate(x1resid=lm1$resid)
```

Demonstrate that using the residuals here results in the same coefficient, standard error, t-statistic and p-value for x1 as in our original regression (lmsim)

```
lmsim2<-lm(y~x1resid+x2, data=Mydata)
summary(lmsim2)
```

```
##
## Call:
## lm(formula = y ~ x1resid + x2, data = Mydata)
##
## Residuals:
##      Min       1Q   Median       3Q      Max
## -4.9605 -1.3618 -0.1088  1.2206  5.3751
##
## Coefficients:
##              Estimate Std. Error t value Pr(>|t|)
## (Intercept) -0.04442    0.21368  -0.208  0.8358
## x1resid      0.18488    0.08781   2.105  0.0378 *
## x2          -0.40599    0.16252  -2.498  0.0142 *
```

```
## ---
## Signif. codes:  0 '***' 0.001 '**' 0.01 '*' 0.05 '.' 0.1 ' ' 1
##
## Residual standard error: 2.134 on 97 degrees of freedom
## Multiple R-squared:  0.09913,    Adjusted R-squared:  0.08056
## F-statistic: 5.337 on 2 and 97 DF,  p-value: 0.006326
```

Store the t-statistic for x1 from this model

```
(tstat<-summary(lmsim)$coefficients[2,3])
```

```
## [1] 2.105456
```

Step 2: create the permutation distribution

```
randsims<-do(10000)*{
  lmrand<-lm(y~shuffle(x1resid)+x2, data=Mydata)
  summary(lmrand)$coefficients[2,3]
}
head(randsims)
```

```
##      result
## 1 -0.3195885
## 2  1.6825919
## 3  1.2424042
## 4 -0.5098583
## 5 -0.5584336
## 6  0.4883965
```

Plot the randomization distribution with our original statistic

```
histogram(~result, data=randsims, v=tstat, col="gray")
```

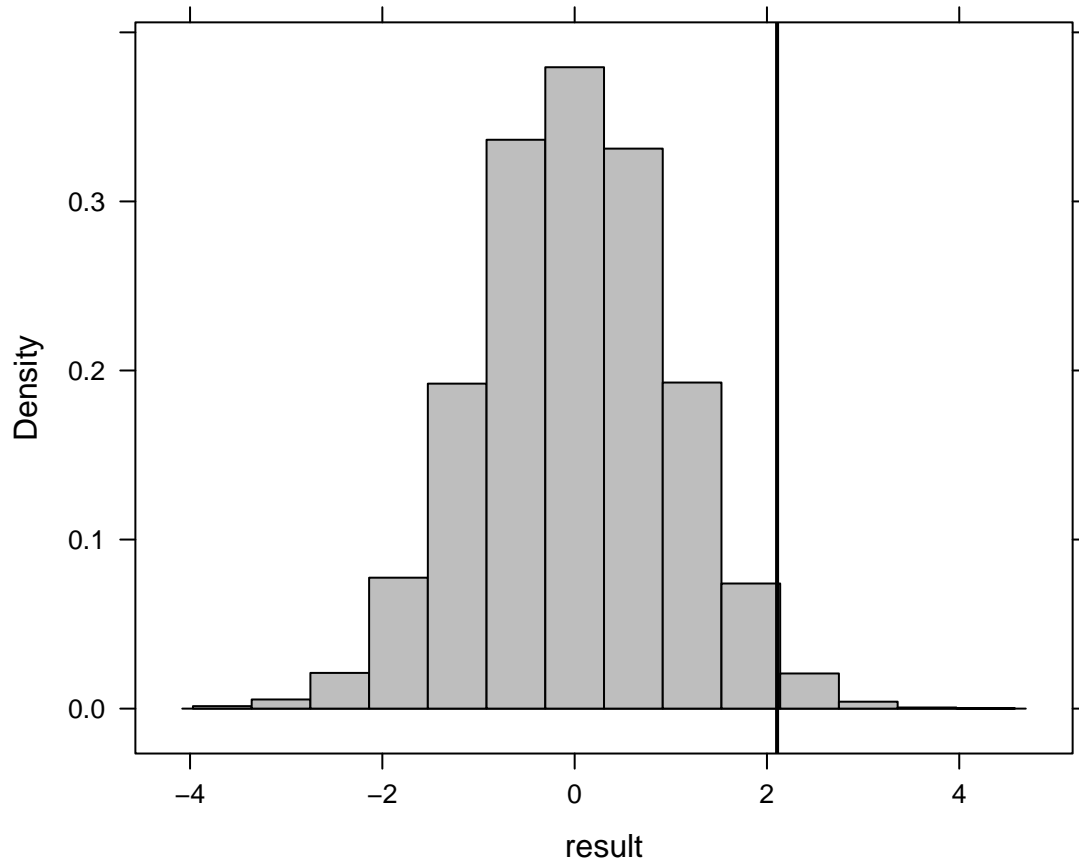

Determine our p-value

```
prop(~I(abs(result)>=tstat), data=randsims)
```

```
## prop_TRUE
##      0.036
```

## Conclusions

The permutation-based approach allows us to relax the Normality assumption. Our randomization-based p-value is really similar to the p-value of the original t-test. This result is not surprising given that the assumptions of linear regression (constant variance, normality, linearity) all hold in the simulation example.

## Document footer

Session Information:

```
sessionInfo()
```

```
## R version 3.6.1 (2019-07-05)
## Platform: x86_64-w64-mingw32/x64 (64-bit)
## Running under: Windows 10 x64 (build 17763)
##
## Matrix products: default
##
```

```

## Random number generation:
## RNG:      Mersenne-Twister
## Normal:   Inversion
## Sample:   Rounding
##
## locale:
## [1] LC_COLLATE=English_United States.1252
## [2] LC_CTYPE=English_United States.1252
## [3] LC_MONETARY=English_United States.1252
## [4] LC_NUMERIC=C
## [5] LC_TIME=English_United States.1252
##
## attached base packages:
## [1] splines      stats      graphics  grDevices  utils      datasets  methods
## [8] base
##
## other attached packages:
## [1] MASS_7.3-51.4      rms_5.1-3.1      SparseM_1.77
## [4] Hmisc_4.2-0        Formula_1.2-3    survival_2.44-1.1
## [7] mgcv_1.8-28        nlme_3.1-140     gmodels_2.18.1
## [10] geepack_1.2-1      boot_1.3-22      ggfortify_0.4.7
## [13] mosaic_1.5.0       Matrix_1.2-17    mosaicData_0.17.0
## [16] ggformula_0.9.2    ggstance_0.3.3   ggplot2_3.2.1
## [19] lattice_0.20-38    dplyr_0.8.3      knitr_1.25
##
## loaded via a namespace (and not attached):
## [1] RColorBrewer_1.1-2  tools_3.6.1      backports_1.1.5
## [4] utf8_1.1.4         R6_2.4.0         rpart_4.1-15
## [7] lazyeval_0.2.2     colorspace_1.4-1 nnet_7.3-12
## [10] withr_2.1.2        tidyselect_0.2.5 gridExtra_2.3
## [13] leaflet_2.0.2      compiler_3.6.1   quantreg_5.51
## [16] cli_1.1.0          htmlTable_1.13.2 sandwich_2.5-1
## [19] ggdendro_0.1-20    labeling_0.3      mosaicCore_0.6.0
## [22] scales_1.0.0       checkmate_1.9.4  mvtnorm_1.0-11
## [25] polyspline_1.1.16  readr_1.3.1      stringr_1.4.0
## [28] digest_0.6.22      foreign_0.8-71   rmarkdown_1.18
## [31] base64enc_0.1-3    pkgconfig_2.0.3  htmltools_0.4.0
## [34] fastmap_1.0.1      highr_0.8         htmlwidgets_1.5.1
## [37] rlang_0.4.1        rstudioapi_0.10  shiny_1.4.0
## [40] generics_0.0.2     zoo_1.8-6         crosstalk_1.0.0
## [43] gtools_3.8.1       acepack_1.4.1     magrittr_1.5
## [46] Rcpp_1.0.2         munsell_0.5.0    fansi_0.4.0
## [49] lifecycle_0.1.0   multcomp_1.4-10  stringi_1.4.3
## [52] yaml_2.2.0         grid_3.6.1       gdata_2.18.0
## [55] promises_1.1.0     ggrepel_0.8.1    crayon_1.3.4
## [58] hms_0.5.2          zeallot_0.1.0    pillar_1.4.2
## [61] codetools_0.2-16  glue_1.3.1       packrat_0.5.0
## [64] evaluate_0.14      latticeExtra_0.6-28 data.table_1.12.6
## [67] vctrs_0.2.0       httpuv_1.5.2     MatrixModels_0.4-1
## [70] gtable_0.3.0       purrr_0.3.3      tidyr_1.0.0
## [73] assertthat_0.2.1  xfun_0.10        mime_0.7
## [76] xtable_1.8-4       broom_0.5.2      later_1.0.0
## [79] tibble_2.1.3       tinytex_0.17     cluster_2.1.0
## [82] TH.data_1.0-10

```
